# Supplementary material for: Molecular structure, spectroscopic signatures and reactivity analyses of paracetamol hydrochloride monohydrate salt using density functional theory calculations
Source: Royal Society of Chemistry journal article supplement (doi:10.1039/c8ce01761a), 2018-01-01
Supplement: c8ce01761a14.pdf [file c8ce01761a14.pdf]

Electronic Supplementary Material (ESI) for Crystallization

This journal is © The Royal Society of Chemistry 2018
