# Supplementary figures and images for: Molecular structure, spectroscopic signatures and reactivity analyses of paracetamol hydrochloride monohydrate salt using density functional theory calculations
Source: Royal Society of Chemistry journal article supplement (doi:10.1039/c8ce01761a), 2018-01-01

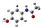

Supplement: c8ce01761a10.pdf [file c8ce01761a10.pdf]

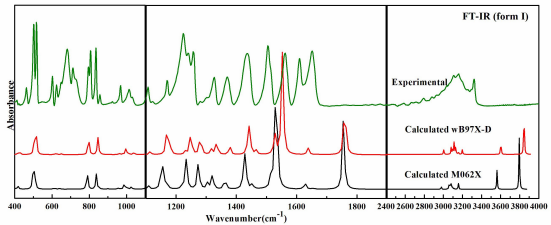

Supplement: c8ce01761a11.pdf [file c8ce01761a11.pdf]

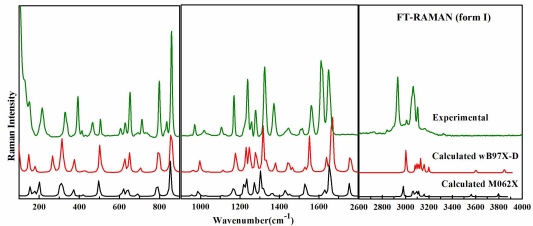

Supplement: c8ce01761a12.pdf [file c8ce01761a12.pdf]

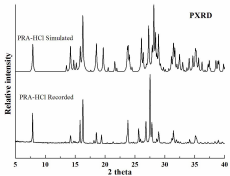

Supplement: c8ce01761a3.pdf [file c8ce01761a3.pdf]

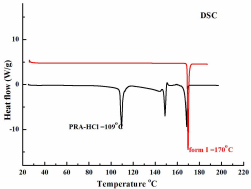

Supplement: c8ce01761a7.pdf [file c8ce01761a7.pdf]

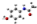

Supplement: c8ce01761a9.pdf [file c8ce01761a9.pdf]
